# Supplementary material for: Face recognition is similarly affected by viewpoint in school-aged children and adults
Source: PeerJ. 2017 May 18;5:e3253. doi: 10.7717/peerj.3253 (PMC5438580; doi:10.7717/peerj.3253)
Supplement: Supplemental Information 2 [file peerj-05-3253-s002.xlsx]

## Sheet: Experiment_1_dataset
subj	order_new	front_cars	front_faces	three_quarter_cars	three_quarter_faces	profile_cars	profile_faces	Gender	sex_num	Age_exact_months	Age_exact_years	age_group	mean_faces	mean_cars	age_group_4groups
1	0	0.8	0.9	0.6	0.9	0.7	0.4	f	1	108	9	9	0.733333	0.7	9and10
2	1	0.7	0.8	0.6	1	0.7	0.4	m	0	105	8	8	0.733333	0.666667	7and8
3	1	0.8	0.9	0.8	0.7	0.8	0.8	m	0		9	9	0.8	0.8	9and10
4	1	0.6	0.9	0.7	0.9	0.8	0.9	f	1	127	10	10	0.9	0.7	9and10
5	0	1	1	0.9	1	1	1	f	1	123	10	10	1	0.966667	9and10
6	0	0.7	1	0.7	0.8	0.8	0.9	f	1	124	10	10	0.9	0.733333	9and10
7	1	1	0.9	0.7	0.6	0.8	0.7	m	0	122	10	10	0.733333	0.833333	9and10
8	0	0.7	0.9	0.7	0.8	0.5	0.7	m	0	121	10	10	0.8	0.633333	9and10
9	1	0.7	0.9	0.9	0.5	0.8	0.8	f	1	110	9	9	0.733333	0.8	9and10
10	1	0.4	1	0.6	0.7	0.6	0.8	m	0	127	10	10	0.833333	0.533333	9and10
11	0	0.8	0.8	0.7	1	0.8	0.8	f	1	119	9	9	0.866667	0.766667	9and10
12	0	0.5	0.8	0.5	0.8	0.5	0.6	f	1	81	6	6	0.733333	0.5	5and6
13	0	0.5	0.5	0.8	0.7	0.8	0.6	m	0	103	8	8	0.6	0.7	7and8
14	0	0.9	0.8	0.3	0.7	0.5	0.6	m	0	113	9	9	0.7	0.566667	9and10
15	0	0.8	1	0.7	0.8	1	0.9	m	0	106	8	8	0.9	0.833333	7and8
16	1	0.9	0.8	0.7	0.7	0.9	0.7	m	0	113	9	9	0.733333	0.833333	9and10
17	1	0.6	0.7	0.8	0.9	0.5	0.7	m	0	105	8	8	0.766667	0.633333	7and8
18	0	0.6	0.4	0.6	0.5	0.5	0.7	f	1	84	7	7	0.533333	0.566667	7and8
19	1	0.6	1	0.6	0.8	0.9	0.9	f	1	102	8	8	0.9	0.7	7and8
20	1	0.5	0.8	0.6	0.8	0.6	0.8	m	0	85	7	7	0.8	0.566667	7and8
21	0	0.8	0.8	0.6	0.8	0.8	0.8	m	0	89	7	7	0.8	0.733333	7and8
22	0	0.5	0.8	0.8	0.4	0.6	0.5	f	1	82	6	6	0.566667	0.633333	5and6
23	0	1	0.7	0.8	0.8	0.8	1	m	0	85	7	7	0.833333	0.866667	7and8
24	0	0.8	1	0.8	1	0.5	1	f	1	287	23	11	1	0.7	adults
25	1	0.6	1	0.6	0.9	0.5	0.8	m	0	265	22	11	0.9	0.566667	adults
26	0	1	1	1	1	0.9	1	m	0	257	21	11	1	0.966667	adults
27	0	0.9	0.8	1	0.6	0.7	0.8	f	1	111	9	9	0.733333	0.866667	9and10
28	1	0.6	0.6	0.5	1	1	0.8	f	1	250	20	11	0.8	0.7	adults
29	0	0.9	0.9	0.6	1	0.7	0.8	f	1	445	37	11	0.9	0.733333	adults
30	0	0.9	0.9	1	1	0.9	0.9	f	1	229	19	11	0.933333	0.933333	adults
31	1	0.7	0.9	0.9	1	0.8	1	f	1		21	11	0.966667	0.8	adults
32	1	0.9	1	0.9	1	0.9	1	f	1	294	24	11	1	0.9	adults
33	1	1	1	0.8	1	0.9	1	f	1	240	20	11	1	0.9	adults
34	0	0.3	0.9	0.3	0.9	0.4	0.8	f	1	266	22	11	0.866667	0.333333	adults
35	0	0.7	0.7	0.8	0.9	0.7	0.8	f	1	248	20	11	0.8	0.733333	adults
36	1	1	0.8	1	1	1	0.8	m	0	253	21	11	0.866667	1	adults
37	0	1	1	1	0.9	1	0.8	m	0	262	21	11	0.9	1	adults
38	1	0.7	0.9	0.8	0.9	0.6	0.8	m	0	261	21	11	0.866667	0.7	adults
39	0	1	1	0.9	1	0.9	1	f	1	257	21	11	1	0.933333	adults
40	1	1	0.9	0.8	1	0.8	1	m	0	91	7	7	0.966667	0.866667	7and8
41	1	1	0.9	0.7	1	0.6	0.8	m	0	91	7	7	0.9	0.766667	7and8
42	1	0.6	0.7	0.8	0.7	0.7	0.5	f	1	80	6	6	0.633333	0.7	5and6
43	1	0.9	0.7	0.6	0.6	0.7	0.7	m	0	79	6	6	0.666667	0.733333	5and6
44	0	0.8	0.4	0.6	0.5	0.5	0.6	f	1	72	6	6	0.5	0.633333	5and6
45	1	0.7	1	0.5	0.8	0.9	0.6	m	0	114	9	9	0.8	0.7	9and10
46	0	0.5	0.9	0.7	0.8	0.5	0.8	f	1	123	10	10	0.833333	0.566667	9and10
47	0	0.5	0.6	0.8	0.9	0.4	0.8	m	0	92	7	7	0.766667	0.566667	7and8
48	0	0.9	0.9	1	0.6	0.9	0.7	m	0	95	7	7	0.733333	0.933333	7and8
49	1	0.5	1	1	1	0.9	0.8	m	0		10	10	0.933333	0.8	9and10
50	0	1	0.9	0.9	0.6	1	0.8	m	0	127	10	10	0.766667	0.966667	9and10
51	1	0.9	0.9	0.8	0.9	0.8	0.4	m	0	127	10	10	0.733333	0.833333	9and10
52	1	0.6	0.8	0.7	0.8	0.7	0.6	m	0	96	8	8	0.733333	0.666667	7and8
53	1	0.8	0.8	0.9	0.7	0.6	0.4	m	0	89	7	7	0.633333	0.766667	7and8
54	1	0.3	0.8	0.3	1	0.5	0.9	f	1	104	8	8	0.9	0.366667	7and8
55	1	1	0.9	0.8	0.9	0.8	0.6	m	0	106	8	8	0.8	0.866667	7and8
56	1	0.5	0.7	0.7	0.9	0.6	0.6	f	1	111	9	9	0.733333	0.6	9and10
57	1	0.8	0.9	1	1	0.9	0.6	m	0	120	10	10	0.833333	0.9	9and10
58	0	0.6	0.8	0.5	1	0.5	0.5	m	0	104	8	8	0.766667	0.533333	7and8
59	0	0.9	0.7	0.6	0.9	0.9	0.8	m	0	109	9	9	0.8	0.8	9and10
60	1	0.8	0.5	0.5	0.5	0.5	0.7	f	1	115	9	9	0.566667	0.6	9and10
61	1	0.7	0.7	0.8	1	0.5	0.9	m	0	116	9	9	0.866667	0.666667	9and10
62	1	0.7	0.5	0.8	0.9	0.7	0.7	f	1	106	8	8	0.7	0.733333	7and8
63	0	0.6	0.7	0.4	0.7	0.6	0.6	f	1	106	8	8	0.666667	0.533333	7and8
64	1	0.5	0.9	0.6	0.8	0.6	0.4	m	0	105	8	8	0.7	0.566667	7and8
65	0	0.8	0.9	0.9	0.5	0.9	0.6	m	0	120	10	10	0.666667	0.866667	9and10
66	0	1	0.8	1	0.9	0.7	0.8	m	0	106	8	8	0.833333	0.9	7and8
67	0	0.7	0.6	0.2	1	0.6	0.9	f	1	88	7	7	0.833333	0.5	7and8
68	0	0.5	0.9	0.3	0.6	0.9	0.9	f	1	78	6	6	0.8	0.566667	5and6
69	1	0.8	0.9	0.4	0.7	0.5	0.8	f	1	79	6	6	0.8	0.566667	5and6
70	0	0.5	0.7	0.5	0.6	0.6	0.8	f	1	78	6	6	0.7	0.533333	5and6
71	1	0.6	0.7	0.7	0.9	0.7	1	f	1	88	7	7	0.866667	0.666667	7and8
72	0	0.6	0.5	0.6	0.8	0.6	0.7	f	1	89	7	7	0.666667	0.6	7and8
73	0	0.8	0.7	0.9	1	0.7	1	f	1	122	10	10	0.9	0.8	9and10
74	1	1	0.9	0.8	0.8	0.8	0.8	f	1	126	10	10	0.833333	0.866667	9and10
75	1	0.5	0.2	0.8	0.8	0.7	0.4	m	0	67	5	5	0.466667	0.666667	5and6
76	0	0.7	0.8	0.6	0.6	0.8	0.6	m	0	64	5	5	0.666667	0.7	5and6
77	1	0.5	0.7	0.4	0.7	0.4	0.5	m	0	67	5	5	0.633333	0.433333	5and6
78	1	0.5	1	0.4	0.3	0.8	0.7	m	0	74	6	6	0.666667	0.566667	5and6
79	1	0.5	0.8	0.7	0.9	0.8	0.9	m	0	69	5	5	0.866667	0.666667	5and6
80	0	0.6	0.8	0.7	0.6	0.7	0.5	m	0	70	5	5	0.633333	0.666667	5and6
81	0	0.7	0.7	0.3	0.9	0.5	0.6	f	1	63	5	5	0.733333	0.5	5and6
82	1	0.8	0.8	0.8	0.9	0.7	0.9	f	1	117	9	9	0.866667	0.766667	9and10
83	1	0.6	1	0.4	0.5	0.7	0.8	m	0	113	9	9	0.766667	0.566667	9and10
84	1	0.3	0.9	0.5	0.8	0.5	0.6	f	1	119	9	9	0.766667	0.433333	9and10
85	1	0.6	0.4	0.4	0.8	0.3	0.5	m	0	69	5	5	0.566667	0.433333	5and6
86	0	0.6	0.7	0.7	0.9	0.6	0.4	m	0	71	5	5	0.666667	0.633333	5and6
87	1	0.6	0.8	0.8	1	0.5	0.7	f	1	71	5	5	0.833333	0.633333	5and6
88	0	1	0.6	0.9	0.8	0.8	0.7	m	0	62	5	5	0.7	0.9	5and6
