# Supplementary material for: Face recognition is similarly affected by viewpoint in school-aged children and adults
Source: PeerJ. 2017 May 18;5:e3253. doi: 10.7717/peerj.3253 (PMC5438580; doi:10.7717/peerj.3253)
Supplement: Supplemental Information 5 [file peerj-05-3253-s005.xlsx]

## Sheet: Experiment_2_dataset
order	subj	car_front_front	car_front_thre	car_front_prof	face_front_front	face_front_thre	face_front_prof	group	FAVIDE	Front_front_general	Front_thre_general	Front_prof_general
facecar	1	1	1	0.9	1	0.8	0.8	0	2	1	0.9	0.85
carface	2	0.7	0.7	0.6	0.8	0.8	0.7	0	2	0.75	0.75	0.65
carface	3	0.4	0.6	0.4	0.8	0.7	0.6	0	2	0.6	0.65	0.5
carface	4	0.9	0.5	0.8	1	0.6	0.5	0	2	0.95	0.55	0.65
facecar	5	0.9	0.7	0.5	1	0.8	0.8	0	2	0.95	0.75	0.65
facecar	6	0.6	0.8	0.3	0.8	0.8	0.7	0	2	0.7	0.8	0.5
carface	7	0.7	0.9	0.7	0.8	1	0.8	0	2	0.75	0.95	0.75
carface	8	0.6	0.9	0.4	0.9	0.8	0.4	0	2	0.75	0.85	0.4
carface	9	0.7	0.7	0.4	0.6	0.7	0.7	0	2	0.65	0.7	0.55
facecar	10	0.8	0.4	0.4	1	0.7	0.8	0	2	0.9	0.55	0.6
facecar	11	0.9	0.4	0.4	1	0.8	0.7	0	2	0.95	0.6	0.55
carface	12	0.9	0.8	0.7	0.7	1	0.8	0	2	0.8	0.9	0.75
carface	13	0.7	0.6	0.7	0.9	0.7	0.7	0	2	0.8	0.65	0.7
facecar	14	0.8	0.9	0.7	0.9	0.9	0.8	0	2	0.85	0.9	0.75
carface	15	0.8	0.8	0.8	1	0.8	0.8	0	2	0.9	0.8	0.8
facecar	16	0.8	0.8	0.8	1	1	0.6	0	2	0.9	0.9	0.7
facecar	17	0.6	0.9	0.7	1	0.8	0.7	0	2	0.8	0.85	0.7
facecar	18	0.7	0.6	0.7	0.7	0.9	0.8	0	2	0.7	0.75	0.75
facecar	19	0.7	0.8	0.4	1	0.9	0.9	0	2	0.85	0.85	0.65
carface	20	0.7	0.7	0.7	1	0.9	0.7	0	2	0.85	0.8	0.7
facecar	21	0.6	0.6	0.5	0.6	0.5	0.5	0	2	0.6	0.55	0.5
carface	22	0.7	0.7	0.5	1	0.6	0.7	0	2	0.85	0.65	0.6
carface	23	0.9	0.6	0.3	0.6	0.7	0.4	1	2	0.75	0.65	0.35
carface	24	0.7	0.4	0.2	0.9	0.5	0.2	1	2	0.8	0.45	0.2
facecar	25	0.4	0.4	0.9	0.6	0.7	0.4	1	2	0.5	0.55	0.65
facecar	26	0.7	0.7	0.6	0.9	0.7	0.6	1	2	0.8	0.7	0.6
carface	27	0.7	0.6	0.6	0.3	0.6	0.5	1	2	0.5	0.6	0.55
carface	28	0.5	0.8	0.3	0.6	0.9	0.7	1	2	0.55	0.85	0.5
carface	29	0.6	0.4	0.3	0.5	0.7	0.5	1	2	0.55	0.55	0.4
facecar	30	0.3	0.6	0.3	1	0.7	0.6	1	2	0.65	0.65	0.45
facecar	31	0.5	0.6	0.7	0.5	0.6	0.5	1	2	0.5	0.6	0.6
carface	32	0.8	0.9	0.5	0.9	0.8	0.7	1	2	0.85	0.85	0.6
carface	33	0.6	0.5	0.7	0.8	0.4	0.4	1	2	0.7	0.45	0.55
carface	34	0.4	0.7	0.6	0.4	0.6	0.6	1	2	0.4	0.65	0.6
carface	35	0.4	0.6	0.4	0.8	0.9	0.6	1	2	0.6	0.75	0.5
facecar	36	0.6	0.3	0.4	0.8	0.6	0.8	1	2	0.7	0.45	0.6
carface	37	0.6	0.4	0.4	0.7	0.3	0.4	1	2	0.65	0.35	0.4
facecar	38	0.7	0.8	0.2	0.5	0.6	0.6	1	2	0.6	0.7	0.4
carface	39	0.7	0.8	0.8	0.9	0.3	0.4	1	2	0.8	0.55	0.6
facecar	40	0.5	0.4	0.3	0.8	0.7	0.4	1	2	0.65	0.55	0.35
								01= children
